# Supplementary material
Source: PubMed Central journal article supplement (PMC5644935)
Supplement: ofa-0010-0407-s01.pdf [file ofa-0010-0407-s01.pdf]

**Original Article**

---

# **Efficacy and Safety of Cathine (Nor-Pseudoephedrine) in the Treatment of Obesity: A Randomized Dose-Finding Study**

Hans Hauner<sup>a</sup> Ljiljana Hastreiter<sup>a</sup> Dieter Werdier<sup>b</sup> Annette Chen-Stute<sup>c</sup> Jürgen Scholze<sup>d</sup> Matthias Blüher<sup>e</sup>

<sup>a</sup>Else Kröner-Fresenius-Center for Nutritional Medicine, Klinikum rechts der Isar, Technische Universität München, Munich, Germany; <sup>b</sup>SAM GmbH, Aachen, Germany; <sup>c</sup>Adipositas-Zentrum Oberhausen, Oberhausen, Germany; <sup>d</sup>Centrum für Innere Medizin, Medizinische Polyklinik, Charité-Universitätsmedizin, Berlin, Germany; <sup>e</sup>Department of Medicine, University of Leipzig, Leipzig, Germany

## **Supplemental Material**

Hauner et al.: Efficacy and Safety of Cathine (Nor-Pseudoephedrine) in the Treatment of Obesity: A Randomized Dose-Finding Study

**Supplementary figure**

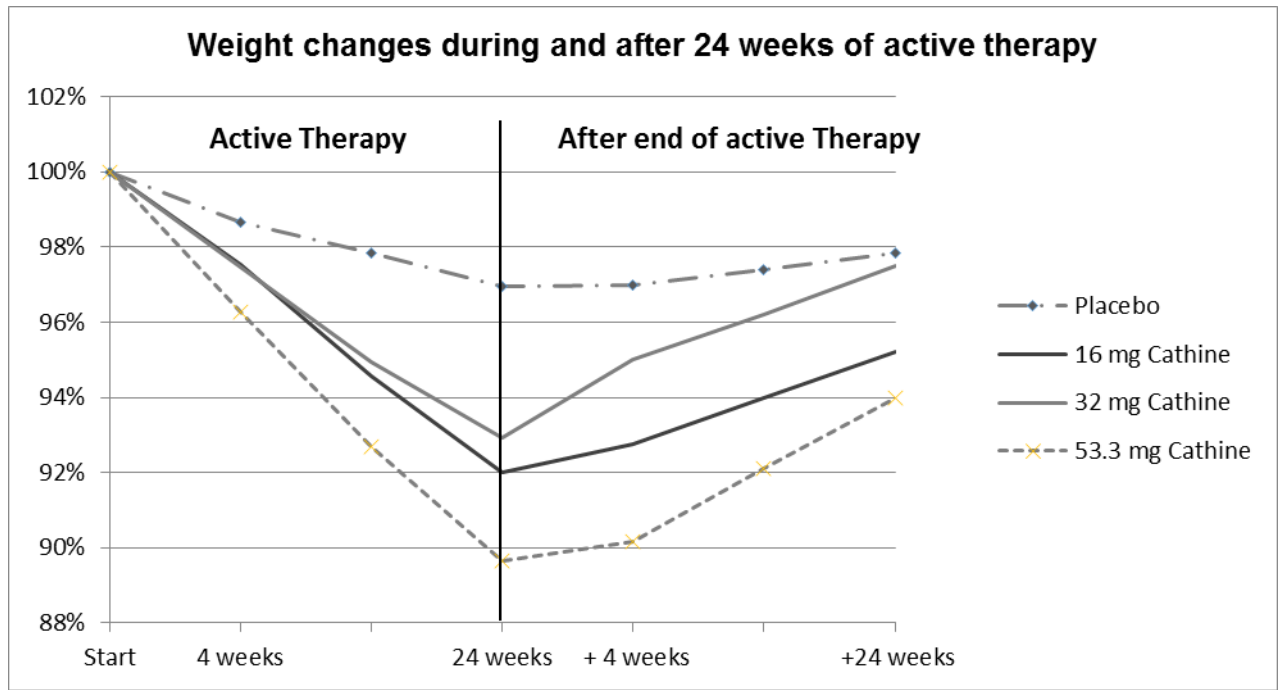

**Supplementary. fig. 1.** Weight changes during and after 24 weeks of active therapy

**Supplementary table 1.** HADS subscores at baseline, after 24 weeks of treatment (24 weeks) and 4 weeks after end of treatment (+ 4 weeks)

|            | Treatment | timepoint | ITT |                       | p value |
|------------|-----------|-----------|-----|-----------------------|---------|
|            |           |           | N   | N (missing) mean (SD) |         |
| Anxiety    | Placebo   | screening | 56  | 3 2.9 (2.4)           | 0.636   |
|            |           | 24 weeks  | 33  | 26 3.0 (3.1)          |         |
|            |           | + 4 weeks | 42  | 17 2.4 (2.5)          |         |
|            | 16 mg     | screening | 56  | 1 3.0 (2.2)           | 0.0616  |
|            |           | 24 weeks  | 42  | 15 2.3 (2.6)          |         |
|            |           | + 4 weeks | 43  | 14 2.3 (2.9)          |         |
|            | 32 mg     | screening | 59  | 2 2.9 (2.1)           | 0.149   |
|            |           | 24 weeks  | 45  | 16 2.4 (2.3)          |         |
|            |           | + 4 weeks | 49  | 12 3.0 (3.2)          |         |
|            | 53.3 mg   | screening | 59  | 1 2.8 (2.0)           | 0.014   |
|            |           | 24 weeks  | 48  | 12 2.2 (2.5)          |         |
|            |           | + 4 weeks | 52  | 8 2.3 (3.0)           |         |
|            | Total     | screening | 230 | 7 3.0 (2.2)           | 0.0129  |
|            |           | 24 weeks  | 168 | 69 2.4 (2.6)          |         |
|            |           | + 4 weeks | 186 | 51 2.5 (2.9)          |         |
| Depression | Placebo   | screening | 57  | 2 2.9 (2.4)           | 0.0332  |
|            |           | 24 weeks  | 33  | 26 2.0 (2.5)          |         |
|            |           | + 4 weeks | 42  | 17 2.2 (2.4)          |         |
|            | 16 mg     | screening | 56  | 1 2.8 (2.4)           | 0.002   |
|            |           | 24 weeks  | 42  | 15 1.5 (2.3)          |         |
|            |           | + 4 weeks | 43  | 14 1.5 (2.4)          |         |
|            | 32 mg     | screening | 59  | 2 2.8 (2.5)           | 0.0203  |
|            |           | 24 weeks  | 44  | 17 1.7 (2.3)          |         |
|            |           | + 4 weeks | 48  | 13 2.1 (2.7)          |         |
|            | 53.3 mg   | screening | 58  | 2 2.5 (2.4)           | <0.0001 |
|            |           | 24 weeks  | 48  | 12 1.1 (2.1)          |         |
|            |           | + 4 weeks | 52  | 8 1.5 (2.9)           |         |
|            | Total     | screening | 230 | 7 2.8 (2.4)           | <0.0001 |
|            |           | 24 weeks  | 167 | 70 1.6 (2.3)          |         |
|            |           | + 4 weeks | 185 | 52 1.8 (2.6)          |         |

HADS: Hospital Anxiety and Depression Scale

Mood disorders were determined by the 14-items HADS questionnaire.

All groups showed statistically significant reductions in the HADS depression subscore after 24 weeks most pronounced in the 53.3 mg group.

---

Hauner et al.: Efficacy and Safety of Cathine (Nor-Pseudoephedrine) in the Treatment of Obesity: A Randomized Dose-Finding Study
